# Supplementary material for: Facile grafting modification of main-chain-type semi-fluorinated alternating fluoropolymersviasimultaneous CuAAC reaction and ATRP in one pot at ambient temperature
Source: Royal Society of Chemistry journal article supplement (doi:10.1039/d2py01478e), 2023-01-01
Supplement: d2py01478e1.pdf [file d2py01478e1.pdf]

## Supporting Information

# Facile Grafting Modification of Main-Chain-Type Semi-fluorinated Alternating Fluoropolymers *via* Simultaneous CuAAC Reaction and ATRP in One Pot at Ambient Temperature

Jiannan Cheng, Xiang Xu, Qing Yu, Chaojie Li, Weiwei He,\* Lifen Zhang,\* and Zhenping Cheng\*

## 1. Experimental Section

### 1.1. Materials

1,6-Diodoper-fluorohexane (TCI, 98%), 1,8-diodoperfluorooctane (TCI, 98%), 1,4-diodoperfluorobutane (TCI, 98%), 1,7-octadiene (Alfa Aesar, > 97%), sodium azide (NaN<sub>3</sub>, Aldrich, 98%), 18-crown-6 (Energy Chemical, ≥ 99%), 5-hexen-1-ol (Macklin, > 97%), 6-bromo-1-hexene (J&K, 97%), pyridine (Aladdin), terephthaloyl chloride (TCI, >99%), 2-bromo-2-methylpropionyl bromide (Aldrich, 98%), propargyl alcohol (Aldrich, 99%) and Ru(bpy)<sub>3</sub>Cl<sub>2</sub> (Energy Chemical, 98%) were used as received and stored in light-resistant container at 0 °C. L(+)-ascorbic acid sodium salt (AsAc-Na) (Aladdin, ≥ 99%) was used as received and stored in desiccator for a dry environment. *N,N,N',N'',N''*-pentamethyldiethylenetriamine (PMDETA, Energy Chemical, 99%) and cuprous bromide (CuBr, Macklin, 99.0%) were refined and stored in the dark environment. Methyl methacrylate (MMA) (Sigma-Aldrich, 99%), methoxypoly(ethylene glycol) methacrylate (PEGMA) (Aldrich, *M<sub>n</sub>* = 500 g/mol, 99%), styrene (Shanghai Chemical Reagents Co. Ltd, AR), *t*-butyl acrylate (*t*-BA) (Shanghai Chemical Reagents Co. Ltd, AR) and methyl acrylate (MA) (Shanghai Chemical Reagents Co. Ltd, AR) were passed through a neutral alumina column for the removal of the inhibitor and stored in the dark environment at 0 °C. Deionized water was purchased from Hangzhou Wahaha Co. Ltd. and potassium carbonate (Shanghai Chemical Reagents Co. Ltd, AR), hydroquinone (J&K, 99%) were used as received. Toluene was obtained from an Aldrich keg system with an inline solvent drying column of activated alumina. All the regular solvents (Analytical reagent) were used directly without any further treatment unless otherwise mentioned.

### 1.2. Measurements

The number-average molar mass (*M<sub>n,GPC</sub>*) and molar mass dispersity (*D*) values of polymers were determined with a TOSOH HLC-8320 gel permeation chromatograph (GPC) equipped with TSK gel Multi pore HZN (3) 4.6×150 mm column. Tetrahydrofuran (THF) and *N,N*-dimethylformamide (DMF) (with 0.1 wt% LiBr) were used as the eluent at a flow rate of 0.35 mL min<sup>-1</sup> at 40 °C. All the GPC samples were injected using a TOSOH HLC-8320 GPC plus autosampler and calibrated with narrow polydispersity PMMA or PS standards purchased from TOSOH. <sup>1</sup>H NMR spectra of monomers and polymers were recorded on a Bruker 300 MHz nuclear magnetic resonance (NMR) instrument using CDCl<sub>3</sub> as the solvent and tetramethylsilane (TMS) as the internal standard at room temperature (25 °C). <sup>19</sup>F NMR spectra of polymers were recorded on a Bruker 600 MHz Advance

III instrument using  $\text{CDCl}_3$  as the solvent and TMS as the internal standard at room temperature (25 °C). Fourier transform infrared spectroscopy (FT-IR) was performed on a Bruker Tensor-27 8000-350 infrared spectrometer and a potassium bromide (KBr) tablet was used as the background. The surface morphology was measured by atomic force microscopy (AFM) in tapping mode (Veeco Instruments Inc., Nanoscope IV). Samples for transmission electron microscopy (TEM) observation were prepared by placing a drop of self-assembled polymer solution onto a 300 mesh copper grid coated with a carbon film. After 30 s, excess fluid was removed using a piece of filter paper. TEM was performed on a HITACHI HT7700 transmission electron microscope with an accelerating voltage of 120 kV. Dynamic light scattering (DLS) measurements were conducted using a NanoBrook 90 Plus instrument at a scattering angle of 90°. The hydrodynamic diameter and the particle size distribution were obtained from the analysis of the autocorrelation functions using the method of cumulants. At least five measurements at 25 °C were made for each sample with an equilibrium time of 1 min before starting the measurement.

**Scheme S1. Synthesis of PBiB<sup>[1]</sup>**

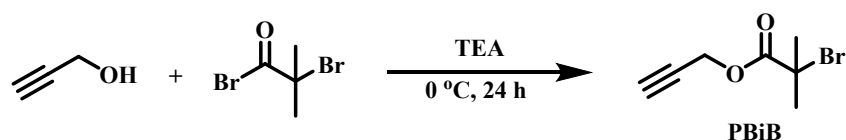

PBiB was synthesized by dropwise addition of 2-bromo-2-methylpropionyl bromide ( $2.04 \times 10^{-2}$  mol) to propargyl alcohol ( $1.94 \times 10^{-2}$  mol) and triethylamine (TEA) ( $2.04 \times 10^{-2}$  mol) solution in diethylether (50 mL) at 0 °C under nitrogen atmosphere. After addition, the reaction mixture was stirred overnight at room temperature. The reaction mixture extracted with water and organic phase was dried with  $\text{Na}_2\text{SO}_4$ . The solution was concentrated and the crude product was purified by column chromatography (petroleum ether/ethyl acetate = 10/1) (v/v) to give the product as a colorless liquid (80 %).  $^1\text{H}$  NMR (300 MHz,  $\text{CDCl}_3$ )  $\delta$ : 4.74 (d, 2H), 3.47 (t, H), 1.93 (s, 3H).

**Scheme S2. Synthesis of Monomer B<sub>2</sub><sup>[2]</sup>**

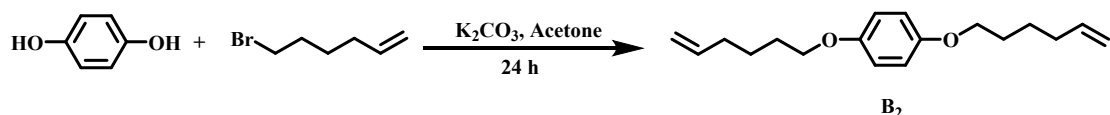

Under an inert atmosphere, a mixture of hydroquinone (6.61 g, 0.06 mol), 6-bromo-1-hexene (4.89 g, 0.03 mol), anhydrous potassium carbonate (4.15 g, 0.03 mol), and dried acetone (100 mL) was added to a 250 mL three-neck round flask, refluxed for 24 h and cooled down to room temperature. After filtration of potassium carbonate, the solvent was rotary evaporated. Then, the crude solid product was dissolved in ethyl acetate (150 mL), which was then washed twice with 50 mL of deionized water, and the organic layer was collected. The organic layer was dried with  $\text{Na}_2\text{SO}_4$  and evaporated, the final crude product was purified by column chromatography (petroleum ether/ethyl acetate = 10/1) (v/v) to obtain a colorless liquid (4.58 g, 70.0 %).  $^1\text{H}$  NMR ( $\text{CDCl}_3$ , 300 MHz),  $\delta$ : 6.81 (s, 4H), 5.82 (ddt, 2H), 5.11-4.89 (m, 4H), 3.90 (t, 4H), 2.12 (q, 4H), 1.84-1.70 (m, 4H), 1.63-1.48 (m, 4H).

**Scheme S3. Synthesis of Monomer B<sub>3</sub><sup>[2]</sup>**

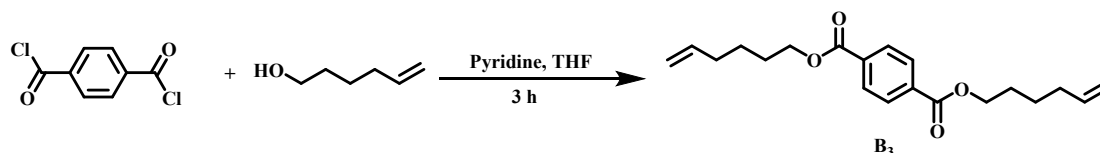

Terephthaloyl chloride (5.08 g, 0.03 mol) was purged with argon and then dissolved in 50 mL of dry THF, followed by the dropwise addition of dry pyridine (3.90 g, 0.05 mol) *via* a syringe. 5-Hexen-1-ol (10.02 g, 0.10 mol) was added dropwise *via* a syringe, after which the mixture was heated to reflux for 3 h under argon. Then, THF was removed in vacuo. The residue was dissolved in 50 mL of H<sub>2</sub>O and washed with 100 mL of diethyl ether. The ether fractions were combined, washed once with 10% aqueous HCl, and washed twice with 10% aqueous Na<sub>2</sub>CO<sub>3</sub>. The organic layer was then dried Na<sub>2</sub>SO<sub>4</sub> and evaporated, the crude product was purified by column chromatography (petroleum ether/ethyl acetate = 4/1) (v/v) to obtain a colorless liquid (7.40 g, 73.3%). <sup>1</sup>H NMR (300 MHz, CDCl<sub>3</sub>) δ: 8.10 (s, 4H), 5.82 (ddt, 2H), 5.12-4.92 (m, 4H), 4.35 (t, 4H), 2.14 (q, 4H), 1.81 (dt, 4H), 1.56 (ddt, 4H).

### 1.3. Synthesis of semi-fluorinated alternating copolymer (AB)<sub>n</sub>A

Taking (A<sub>2</sub>B<sub>1</sub>)<sub>n</sub>A<sub>2</sub> as the example, polymerizations of 1,6-diiodoper-fluorohexane (A<sub>2</sub>) and 1,7-octadiene (B<sub>1</sub>) was performed in the presence of blue LED light ( $\lambda_{\text{max}} = 459 \text{ nm}$ , 5.5 mW/cm<sup>2</sup>) under an argon atmosphere with a molar ratio of [A<sub>2</sub>]<sub>0</sub>: [B<sub>1</sub>]<sub>0</sub>: [Ru(bpy)<sub>3</sub>Cl<sub>2</sub>]<sub>0</sub>: [AsAc-Na]<sub>0</sub> = 1.2 : 1 : 0.02 : 0.5 was described as follows: A mixture of 1,6-diiodoper-fluorohexane (A<sub>2</sub>) (0.6 mmol), 1,7-octadiene (B<sub>1</sub>), Ru(bpy)<sub>3</sub>Cl<sub>2</sub> and AsAc-Na was added to a dried ampoule with a stir bar. Then 4.0 mL of the solution mixture of 1,4-dioxane and methanol (CH<sub>3</sub>OH) with a feed ratio of 3/1 (v/v) was added for the thorough dissolution of the mixture. The reaction mixture was degassed by at least four freeze-pump-thaw cycles to totally eliminate the dissolved oxygen, and then the ampoule was flame-sealed and placed in the presence of blue LED light with stirring. The whole system was fanned for the maintenance of the temperature at 25 °C. After a predetermined period of time, the ampoule was opened and then the mixture was passed through a neutral alumina column before being precipitated into a large amount of methanol (250 mL) to remove the catalyst. The polymers obtained by filtration were dried under vacuum at 35 °C overnight until a constant weight. The yield and molecular weight of polymers were determined gravimetrically and analyzed by GPC and NMR.

### 1.4. Synthesis of azide semi-fluorinated alternating copolymer (AB)<sub>n</sub>A-N<sub>3</sub>

Taking (A<sub>2</sub>B<sub>1</sub>)<sub>n</sub>A<sub>2</sub> as the example, (A<sub>2</sub>B<sub>1</sub>)<sub>n</sub>A<sub>2</sub> (the theoretical moles of iodine 2 mmol), sodium azide (4 mmol) and 18-crown-6 (8 mmol) were added to a dried ampoule with a stir bar. Then 10.0 mL CHCl<sub>3</sub> was added and the ampoule was flame-sealed and allowed to stir at 55 °C for 36 hours. Then, the reaction mixture was purified by filtration through a short Al<sub>2</sub>O<sub>3</sub> column to remove the NaN<sub>3</sub>, followed by precipitation into a large amount of cold methanol (250 mL). The final polymer (A<sub>2</sub>B<sub>1</sub>)<sub>n</sub>A<sub>2</sub>-N<sub>3</sub> was gained by filtration and dried under vacuum at 0 °C for 24 h. The conversion and molecular weight of polymers were determined and analyzed by GPC and NMR.

### 1.5. Synthesis of fluorinated graft copolymers with semi-fluorinated alternating backbone via CuAAC and ATRP in one pot

A typical procedure of polymerization was carried out under an argon atmosphere with a molar ratio

of  $[\text{PEGMA}]_0/[\text{PBiB}]_0/[(\text{AB})_n\text{A-N}_3]_0/[\text{CuBr}]_0/[\text{PMEDTA}]_0 = 50/1/1/0.2/1$  and 1/3 ratio of PEGMA/toluene (v/v), where  $[(\text{AB})_n\text{A-N}_3]_0$  means moles of attached  $-\text{N}_3$  groups to  $(\text{AB})_n\text{A}$  main chain. The reaction mixture was weighed into the Schlenk tube and evacuated and argon-refilled at least four freeze-pump-thaw cycles to totally eliminate the dissolved oxygen. Then the polymerization was started by stirring at 25 °C. Aliquots were removed periodically and diluted into  $\text{CDCl}_3$  for NMR analysis and calculation of conversion. The solvent from the same samples was evaporated and diluted into DMF or  $\text{CHCl}_3$  for GPC and FT-IR characterization. After a predetermined period of time, the reaction mixture was purified by filtration through a short  $\text{Al}_2\text{O}_3$  column to remove the catalyst, followed by precipitation into a large amount of petroleum ether (250 mL) twice to remove the unreacted monomer.

### **1.6. Synthesis of fluorinated graft copolymers with semi-fluorinated alternating backbone by two steps of CuAAC and ATRP**

A typical procedure of polymerization was carried out under an argon atmosphere with a molar ratio of  $[\text{PBiB}]_0/[(\text{AB})_n\text{A-N}_3]_0/[\text{CuBr}]_0/[\text{PMEDTA}]_0 = 1/1/0.2/1$ , where  $[(\text{AB})_n\text{A-N}_3]_0$  means moles of attached  $-\text{N}_3$  groups to  $(\text{AB})_n\text{A}$  main chain. The reaction mixture was weighed into the dried ampoule with a stir bar and argon-refilled at least four freeze-pump-thaw cycles to totally eliminate the dissolved oxygen. Then the reaction was started by stirring at 25 °C. After a predetermined period of time, the reaction mixture was purified by filtration through a short  $\text{Al}_2\text{O}_3$  column to remove the catalyst, followed by precipitation into a large amount of petroleum ether (250 mL). The polymer  $(\text{A}_2\text{B}_1)_n\text{A}_2\text{-Br}$  was gained by filtration and dried under vacuum at 35 °C overnight. The conversion and molecular weight of polymers were determined and analyzed by GPC and NMR. Then, the mixture of the ratio of  $[\text{PEGMA}]_0/[(\text{A}_2\text{B}_1)_n\text{A}_2\text{-Br}]_0/[\text{CuBr}]_0/[\text{PMEDTA}]_0 = 50/1/0.2/1$  and 1/3 ratio of PEGMA/toluene (v/v) were added into the dried ampoule with a stir bar and argon-refilled at least four freeze-pump-thaw cycles to totally eliminate the dissolved oxygen, where  $[(\text{AB})_n\text{A-Br}]_0$  means moles of attached initiator  $-\text{Br}$  groups to  $(\text{AB})_n\text{A}$  main chain. Then the reaction was started by stirring at 25 °C, 50 °C or 90 °C. After a predetermined period of time, the reaction mixture was purified by filtration through a short  $\text{Al}_2\text{O}_3$  column to remove the catalyst, followed by precipitation into a large amount of petroleum ether (250 mL). The final graft copolymer was gained by filtration and dried under vacuum at 35 °C overnight. The conversion and molecular weight of polymers were determined and analyzed by GPC and NMR.

### **1.7. Self-assembly of fluorinated graft copolymers $(\text{AB})_n\text{A-g-PPEGMA}$**

There are two self-assembly methods of fluorinated graft copolymers  $(\text{AB})_n\text{A-g-PPEGMA}$  in the article.

1. Fluorinated graft copolymers are added directly in deionized water under vigorous stirring to obtain 0.5 mg/mL polymer aqueous solution.
2. Fluorinated graft copolymers are dissolved in the good solvent (DMF/THF) and deionized water was added slowly (about 0.1 mL/h) to the fluorinated graft copolymer solutions (DMF/THF) under vigorous stirring to obtain 0.5 mg/mL mixed solution.

## 2. Supporting Tables and Figures

### 2.1. Tables

**Table S1.** Synthesis of main-chain-type semi-fluorinated alternating copolymer (AB)<sub>n</sub>A<sup>a</sup>

| Entry | A              | B              | time (h) | Yield <sup>b</sup> (%) | $M_{n,GPC}^c$ (g/mol) | $\mathcal{D}^c$ |
|-------|----------------|----------------|----------|------------------------|-----------------------|-----------------|
| 1     | A <sub>1</sub> | B <sub>1</sub> | 40       | 73.1                   | 6700                  | 2.25            |
| 2     | A <sub>2</sub> | B <sub>1</sub> | 48       | 71.0                   | 8700                  | 2.14            |
| 3     | A <sub>2</sub> | B <sub>1</sub> | 40       | 68.9                   | 5600                  | 1.64            |
| 4     | A <sub>2</sub> | B <sub>1</sub> | 40       | 69.2                   | 5400                  | 1.48            |
| 5     | A <sub>3</sub> | B <sub>1</sub> | 40       | 58.4                   | 7000                  | 1.75            |
| 6     | A <sub>2</sub> | B <sub>2</sub> | 36       | 63.0                   | 7000                  | 2.24            |
| 7     | A <sub>1</sub> | B <sub>3</sub> | 36       | 60.3                   | 6400                  | 2.47            |
| 8     | A <sub>2</sub> | B <sub>3</sub> | 36       | 64.0                   | 4800                  | 2.32            |
| 9     | A <sub>2</sub> | B <sub>1</sub> | 40       | 70.2                   | 4600                  | 1.27            |

<sup>a</sup>Polymerization condition:  $[A]_0/[B]_0/[Ru(bpy)_3Cl_2]_0/[AsAc-Na]_0 = 1.2/1/0.02/0.5$ ,  $n_{(B)} = 1.0$  mmol, under irradiation with blue LED light ( $\lambda_{max} = 459$  nm, 5.5 mW/cm<sup>2</sup>), T = 25 °C,  $V_{1,4-dioxane}/V_{methanol} = 3/1$ ,  $V_{total\ Solvent} = 8.0$  mL. <sup>b</sup>Yield of the polymerization was determined gravimetrically. <sup>c</sup>Number-average molar mass ( $M_{n,GPC}$ ) and molar mass dispersity ( $\mathcal{D}$ ) were determined by GPC using linear PMMA as calibration standard in THF.

**Table S2.** Synthesis of azide semi-fluorinated alternating copolymer (AB)<sub>n</sub>A-N<sub>3</sub><sup>a</sup>

| Entry | (AB) <sub>n</sub> A                                          | $M_{(AB)_nA}$ (g/mol) | $\mathcal{D}_{(AB)_nA}$ | Conv. <sup>b</sup> (%) | $M_{n,GPC}^c$ (g/mol) | $\mathcal{D}^c$ |
|-------|--------------------------------------------------------------|-----------------------|-------------------------|------------------------|-----------------------|-----------------|
| 1     | (A <sub>1</sub> B <sub>1</sub> ) <sub>n</sub> A <sub>1</sub> | 6700                  | 2.25                    | 85.2                   | 5700                  | 1.66            |
| 2     | (A <sub>1</sub> B <sub>3</sub> ) <sub>n</sub> A <sub>1</sub> | 6400                  | 2.47                    | 72.0                   | 8700                  | 1.65            |
| 3     | (A <sub>2</sub> B <sub>1</sub> ) <sub>n</sub> A <sub>2</sub> | 4600                  | 1.27                    | 86.5                   | 6500                  | 1.21            |
| 4     | (A <sub>2</sub> B <sub>1</sub> ) <sub>n</sub> A <sub>2</sub> | 5600                  | 1.64                    | 88.6                   | 11300                 | 1.36            |
| 5     | (A <sub>2</sub> B <sub>1</sub> ) <sub>n</sub> A <sub>2</sub> | 8700                  | 2.14                    | 86.0                   | 12500                 | 1.73            |
| 6     | (A <sub>2</sub> B <sub>2</sub> ) <sub>n</sub> A <sub>2</sub> | 7000                  | 2.24                    | 84.0                   | 11800                 | 2.01            |
| 7     | (A <sub>2</sub> B <sub>3</sub> ) <sub>n</sub> A <sub>2</sub> | 4800                  | 2.32                    | 73.6                   | 7500                  | 1.52            |
| 8     | (A <sub>3</sub> B <sub>1</sub> ) <sub>n</sub> A <sub>3</sub> | 7000                  | 1.75                    | 87.7                   | 9100                  | 1.58            |

<sup>a</sup>Reaction conditions:  $[(AB)_nA]_0/[NaN_3]_0/[18-crown-6]_0 = 1/2/4$ ,  $[(AB)_nA]_0$  means moles of attached I atoms to (AB)<sub>n</sub>A main chain.  $m_{(AB)_nA} = 0.2$  g,  $V_{CHCl_3} = 4.0$  mL, T = 55 °C, t = 40 h. <sup>b</sup>Reaction conversion estimated by <sup>1</sup>H NMR spectra. <sup>c</sup>Number-average molar mass ( $M_{n,GPC}$ ) and molar mass dispersity ( $\mathcal{D}$ ) were determined by GPC using linear PMMA as calibration standard in THF.

**Table S3.** Effects of various components on the ATRP polymerization of various monomers<sup>a</sup>

| Entry          | Ratio         | M     | $M_{(A_2B_1)_nA_2-N_3}$<br>(g/mol) | $D_{(A_2B_1)_nA_2-N_3}$ | time<br>(h) | Conv. <sup>b</sup><br>(%) | $M_{n,GPC}$ <sup>c</sup><br>(g/mol) | $D$ <sup>c</sup>  |
|----------------|---------------|-------|------------------------------------|-------------------------|-------------|---------------------------|-------------------------------------|-------------------|
| <sup>d</sup> 1 | 100/1/0/0.2/1 | MA    | --                                 | --                      | 20          | 2.6                       | <sup>e</sup> 100                    | <sup>e</sup> 1.01 |
| <sup>d</sup> 2 | 100/1/0/0.2/1 | MMA   | --                                 | --                      | 20          | 6.0                       | <sup>e</sup> 3300                   | <sup>e</sup> 1.17 |
| 3              | 50/1/0/0.2/1  | PEGMA | --                                 | --                      | 20          | 5.3                       | 6600                                | 1.11              |
| 4              | 50/0/1/0.2/1  | PEGMA | 8800                               | 1.44                    | 24          | 4.6                       | 8500                                | 1.01              |
| 5              | 50/1/1/0/0    | PEGMA | 8800                               | 1.44                    | 24          | 10.4                      | 8300                                | 1.10              |

<sup>a</sup>Polymerization conditions: Ratio = [M]<sub>0</sub>/[PBiB]<sub>0</sub>/[(A<sub>2</sub>B<sub>1</sub>)<sub>n</sub>A<sub>2</sub>-N<sub>3</sub>]<sub>0</sub>/[CuBr]<sub>0</sub>/[PMDETA]<sub>0</sub>, [(A<sub>2</sub>B<sub>1</sub>)<sub>n</sub>A<sub>2</sub>-N<sub>3</sub>]<sub>0</sub> means moles of attached -N<sub>3</sub> groups to (A<sub>2</sub>B<sub>1</sub>)<sub>n</sub>A<sub>2</sub> main chain.  $V_{\text{monomer}} = 1.0$  mL,  $V_{\text{toluene}} = 3.0$  mL, T = 25 °C. <sup>b</sup>Conversion of the monomer was estimated by <sup>1</sup>H NMR spectra. <sup>c</sup>Number-average molar mass ( $M_{n,GPC}$ ) and molar mass dispersity ( $D$ ) were determined by GPC using linear PS as calibration standard in DMF (with 0.1 wt% LiBr). <sup>d</sup> $V_{\text{monomer}} = 0.5$  mL,  $V_{\text{toluene}} = 2.0$  mL. <sup>e</sup>Number-average molar mass ( $M_{n,GPC}$ ) and molar mass dispersity ( $D$ ) were determined by GPC using linear PMMA as calibration standard in THF.

**Table S4.** Synthesis of macroinitiator (A<sub>2</sub>B<sub>1</sub>)<sub>n</sub>A<sub>2</sub>-Br via CuAAC reaction<sup>a</sup>

| Entry | Ratio     | $M_{(A_2B_1)_nA_2-N_3}$<br>(g/mol) | $D_{(A_2B_1)_nA_2-N_3}$ | time<br>(h) | Conv. <sup>b</sup><br>(%) | $M_{n,GPC}$ <sup>c</sup><br>(g/mol) | $D$ <sup>c</sup> |
|-------|-----------|------------------------------------|-------------------------|-------------|---------------------------|-------------------------------------|------------------|
| 1     | 1/1/0.2/1 | 6500                               | 1.21                    | 12          | 99.9                      | 7600                                | 1.35             |

<sup>a</sup>Reaction conditions: [(AB)<sub>n</sub>A-N<sub>3</sub>]<sub>0</sub>/[PBiB]<sub>0</sub>/[CuBr]<sub>0</sub>/[PMDETA]<sub>0</sub>, [(A<sub>2</sub>B<sub>1</sub>)<sub>n</sub>A<sub>2</sub>-N<sub>3</sub>]<sub>0</sub> means moles of attached -N<sub>3</sub> groups to (A<sub>2</sub>B<sub>1</sub>)<sub>n</sub>A<sub>2</sub> main chain.  $m_{(AB)_nA} = 0.2$  g,  $V_{\text{toluene}} = 3.0$  mL, T = 25 °C. <sup>b</sup>Reaction conversion estimated by <sup>1</sup>H NMR spectra. <sup>c</sup>Number-average molar mass ( $M_{n,GPC}$ ) and molar mass dispersity ( $D$ ) were determined by GPC using linear PMMA as calibration standard in THF.

**Table S5.** Graft polymerization of MA from macroinitiator (A<sub>2</sub>B<sub>1</sub>)<sub>n</sub>A<sub>2</sub>-Br via ATRP with different temperature<sup>a</sup>

| Entry | T<br>(°C) | Conv. <sup>b</sup><br>(%) | $M_{n,theo}$ <sup>c</sup><br>(g/mol) | $M_{n,GPC}$ <sup>d</sup><br>(g/mol) | $D$ <sup>d</sup> |
|-------|-----------|---------------------------|--------------------------------------|-------------------------------------|------------------|
| 1     | 25        | --                        | --                                   | --                                  | --               |
| 2     | 50        | --                        | --                                   | --                                  | --               |
| 3     | 90        | 74.5                      | 62100                                | 33600                               | 1.72             |

<sup>a</sup>Polymerization conditions: [MA]<sub>0</sub>/[(A<sub>2</sub>B<sub>1</sub>)<sub>n</sub>A<sub>2</sub>-Br]<sub>0</sub>/[CuBr]<sub>0</sub>/[PMDETA]<sub>0</sub> = 50/1/0.2/1, [(A<sub>2</sub>B<sub>1</sub>)<sub>n</sub>A<sub>2</sub>-Br]<sub>0</sub> means moles of attached -Br groups to (A<sub>2</sub>B<sub>1</sub>)<sub>n</sub>A<sub>2</sub> main chain.  $V_{\text{monomer}} = 0.5$  mL,  $V_{\text{toluene}} = 2.0$  mL.  $M_{(A_2B_1)_nA_2-Br} = 7600$  g/mol,  $D = 1.35$ . <sup>b</sup>Conversion of the monomer was estimated by <sup>1</sup>H NMR spectra. <sup>c</sup>Theoretical  $M_n$  of graft copolymers were calculated from monomer conversions. <sup>d</sup> $M_{n,GPC}$  and  $D$  were determined by GPC using linear PMMA as calibration standard in THF.

**Table S6.** The kinetics of the ATRP process of MA with different polymerization time<sup>a</sup>

| Entry | time (h) | Conv. <sup>b</sup> (%) | $M_{n,theo}^c$ (g/mol) | $M_{n,GPC}^d$ (g/mol) | $D^d$ |
|-------|----------|------------------------|------------------------|-----------------------|-------|
| 1     | 0        | --                     | --                     | 12600                 | 1.30  |
| 2     | 4        | 8.8                    | 31700                  | 17500                 | 1.52  |
| 3     | 8        | 14.5                   | 41500                  | 18400                 | 1.42  |
| 4     | 12       | 21.5                   | 53600                  | 20400                 | 1.41  |
| 5     | 24       | 28.9                   | 66300                  | 22600                 | 1.42  |
| 6     | 36       | 29.4                   | 67200                  | 24000                 | 1.42  |

<sup>a</sup>Polymerization conditions:  $[MA]_0/[PBiB]_0/[(A_2B_1)_nA_2-N_3]_0/[CuBr]_0/[PMDETA]_0 = 100/1/1/0.2/1$ ,  $[(A_2B_1)_nA_2-N_3]_0$  means moles of attached  $-N_3$  groups to  $(A_2B_1)_nA_2$  main chain.  $V_{monomer} = 2.5$  mL,  $V_{toluene} = 10.0$  mL,  $T = 25$  °C.  $M_{(A_2B_1)_nA_2-N_3} = 12500$  g/mol,  $D = 1.73$ . <sup>b</sup>Conversion of the monomer was estimated by <sup>1</sup>H NMR spectra. <sup>c</sup>Theoretical  $M_n$  of graft copolymers were calculated from monomer conversions. <sup>d</sup> $M_{n,GPC}$  and  $D$  were determined by GPC using linear PMMA as calibration standard in THF.

**Table S7.** The kinetics of the ATRP process of PEGMA with different polymerization time<sup>a</sup>

| Entry | time (h) | Conv. <sup>b</sup> (%) | $M_{n,theo}^c$ (g/mol) | $M_{n,GPC}^d$ (g/mol) | $D^d$ |
|-------|----------|------------------------|------------------------|-----------------------|-------|
| 1     | 0.0      | --                     | --                     | 8700                  | 1.13  |
| 2     | 1.0      | 1.8                    | 14400                  | 16700                 | 1.18  |
| 3     | 2.0      | 5.6                    | 22400                  | 24100                 | 1.20  |
| 4     | 4.5      | 27.7                   | 69400                  | 37700                 | 1.22  |
| 5     | 6.0      | 37.0                   | 89200                  | 47400                 | 1.23  |
| 6     | 8.0      | 51.3                   | 119500                 | 51500                 | 1.26  |
| 7     | 10.0     | 63.4                   | 145300                 | 58700                 | 1.32  |
| 8     | 11.0     | 66.9                   | 152700                 | 62300                 | 1.32  |
| 9     | 12.0     | 71.2                   | 161800                 | 63900                 | 1.31  |
| 10    | 24.0     | 89.0                   | 199700                 | 74700                 | 1.38  |

<sup>a</sup>Polymerization conditions:  $[PEGMA]_0/[PBiB]_0/[(A_2B_1)_nA_2-N_3]_0/[CuBr]_0/[PMDETA]_0 = 50/1/1/0.2/1$ ,  $[(A_2B_1)_nA_2-N_3]_0$  means moles of attached  $-N_3$  groups to  $(A_2B_1)_nA_2$  main chain.  $V_{monomer} = 3.0$  mL,  $V_{toluene} = 9.0$  mL,  $T = 25$  °C.  $M_{(A_2B_1)_nA_2-N_3} = 8800$  g/mol,  $D = 1.24$ . <sup>b</sup>Conversion of the monomer was estimated by <sup>1</sup>H NMR spectra. <sup>c</sup>Theoretical  $M_n$  of graft copolymers were calculated from monomer conversions. <sup>d</sup> $M_{n,GPC}$  and  $D$  were determined by GPC using linear PS as calibration standard in DMF (with 0.1 wt% LiBr).

**Table S8.** Synthesis of fluorinated graft copolymer (AB)<sub>n</sub>A-g-PPEGMA with various fluorinated backbone<sup>a</sup>

| Entry | (AB) <sub>n</sub> A-N <sub>3</sub>                                           | $M_{(AB)_nA-N_3}$<br>(g/mol) | $D_{(AB)_nA-N_3}$ | time<br>(h) | Conv. <sup>b</sup><br>(%) | $M_{n,GPC}^c$<br>(g/mol) | $D^c$ |
|-------|------------------------------------------------------------------------------|------------------------------|-------------------|-------------|---------------------------|--------------------------|-------|
| 1     | (A <sub>1</sub> B <sub>1</sub> ) <sub>n</sub> A <sub>1</sub> -N <sub>3</sub> | 5700                         | 1.66              | 9           | 76.6                      | 123000                   | 1.62  |
| 2     | (A <sub>3</sub> B <sub>1</sub> ) <sub>n</sub> A <sub>3</sub> -N <sub>3</sub> | 9100                         | 1.58              | 9           | 65.5                      | 127000                   | 1.50  |
| 3     | (A <sub>2</sub> B <sub>2</sub> ) <sub>n</sub> A <sub>2</sub> -N <sub>3</sub> | 11800                        | 2.01              | 8           | 33.6                      | 39600                    | 1.72  |
| 4     | (A <sub>1</sub> B <sub>3</sub> ) <sub>n</sub> A <sub>1</sub> -N <sub>3</sub> | 8700                         | 1.65              | 9           | 34.8                      | 55500                    | 1.51  |
| 5     | (A <sub>2</sub> B <sub>3</sub> ) <sub>n</sub> A <sub>1</sub> -N <sub>3</sub> | 7500                         | 1.52              | 11          | 71.7                      | 78300                    | 1.49  |

<sup>a</sup>Polymerization conditions: [PEGMA]<sub>0</sub>/[PBiB]<sub>0</sub>/[(AB)<sub>n</sub>A-N<sub>3</sub>]<sub>0</sub>/[CuBr]<sub>0</sub>/[PMDETA]<sub>0</sub> = 50/1/1/0.2/1, [(AB)<sub>n</sub>A-N<sub>3</sub>]<sub>0</sub> means moles of attached -N<sub>3</sub> groups to (AB)<sub>n</sub>A main chain.  $V_{monomer}$  = 1.0 mL,  $V_{toluene}$  = 3.0 mL, T = 25 °C.

<sup>b</sup>Conversion of the monomer was estimated by <sup>1</sup>H NMR spectra. <sup>c</sup> $M_{n,GPC}$  and  $D$  were determined by GPC using linear PS as calibration standard in DMF (with 0.1 wt% LiBr).



## 2.2. Figures

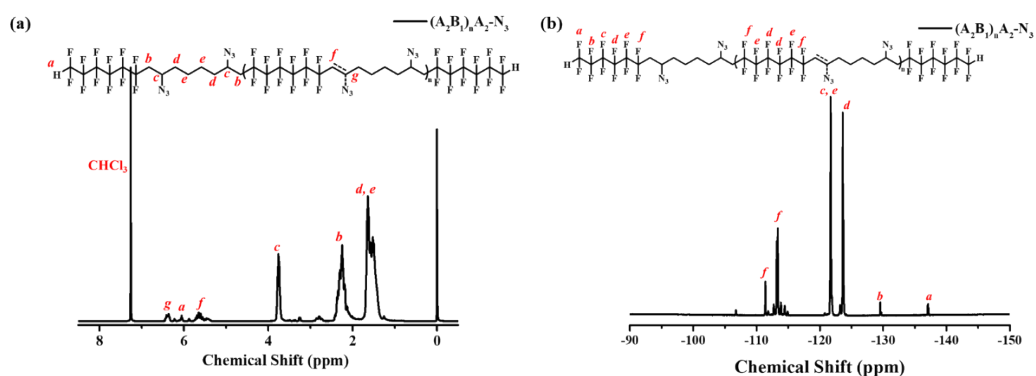

**Fig. S1** (a)  $^1H$  NMR spectrum and (b)  $^{19}F$  NMR spectrum of the semi-fluorinated alternating copolymer  $(A_2B_1)_nA_2-N_3$  in  $CDCl_3$ .

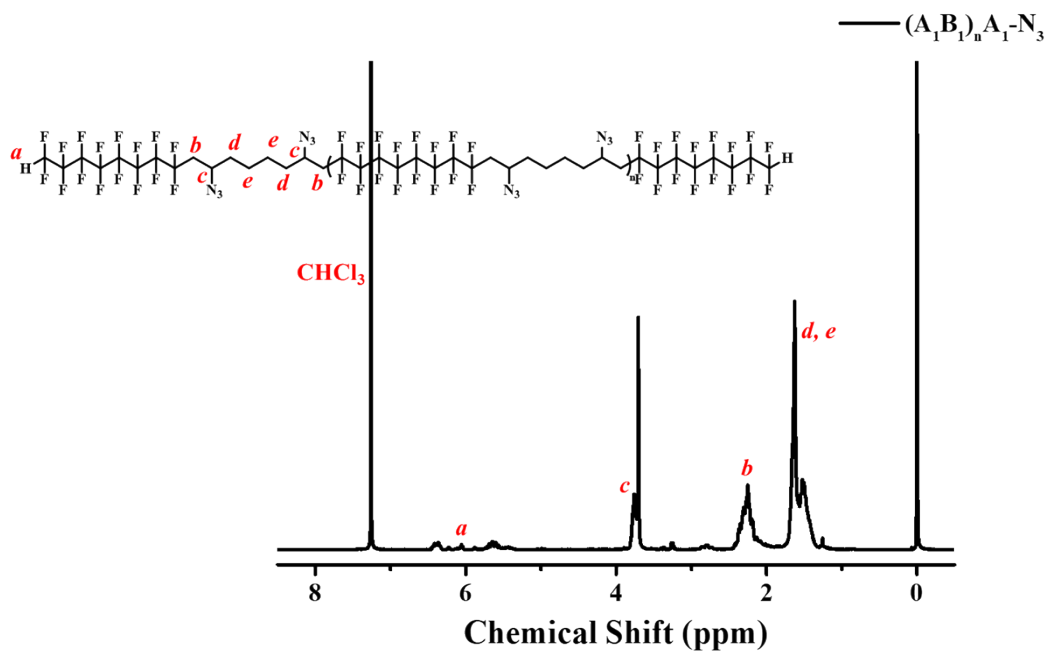

**Fig. S2**  $^1H$  NMR spectrum of semi-fluorinated alternating copolymer  $(A_1B_1)_nA_1-N_3$  in  $CDCl_3$ .

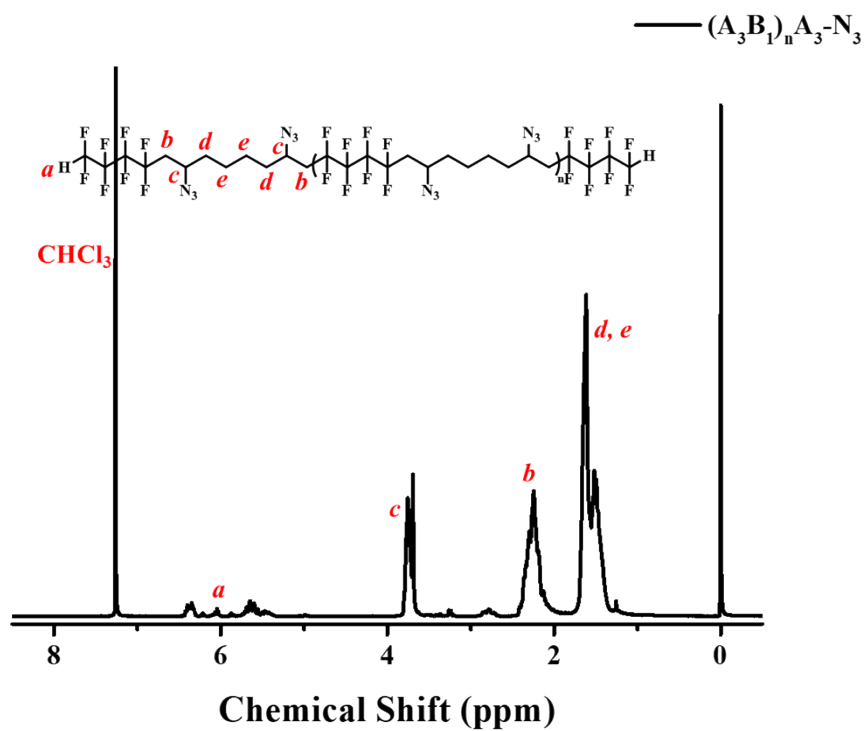

Fig. S3  $^1\text{H}$  NMR spectrum of semi-fluorinated alternating copolymer  $(A_3B_1)_n A_3-N_3$  in  $\text{CDCl}_3$ .

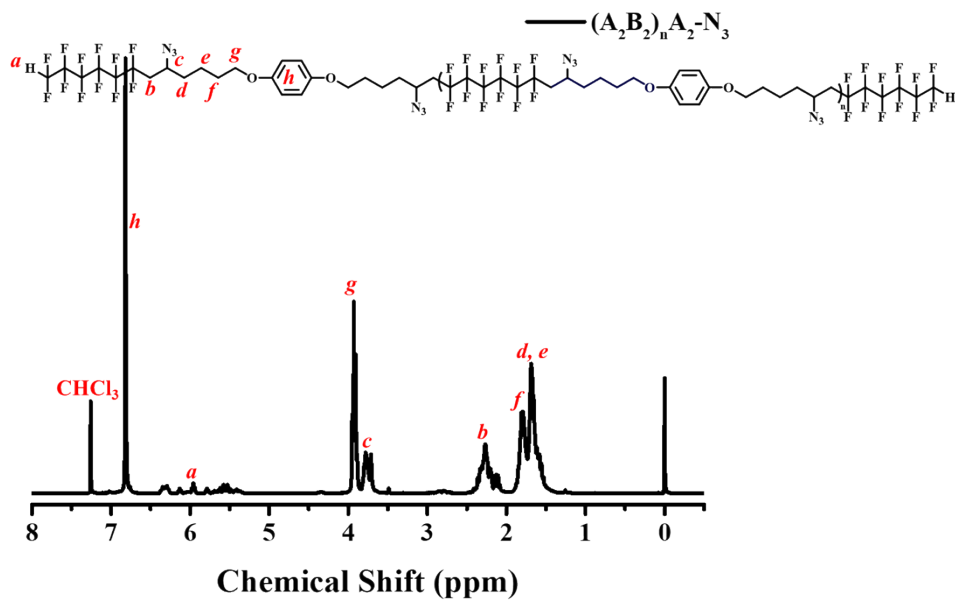

Fig. S4  $^1\text{H}$  NMR spectrum of semi-fluorinated alternating copolymer  $(A_2B_2)_n A_2-N_3$  in  $\text{CDCl}_3$ .

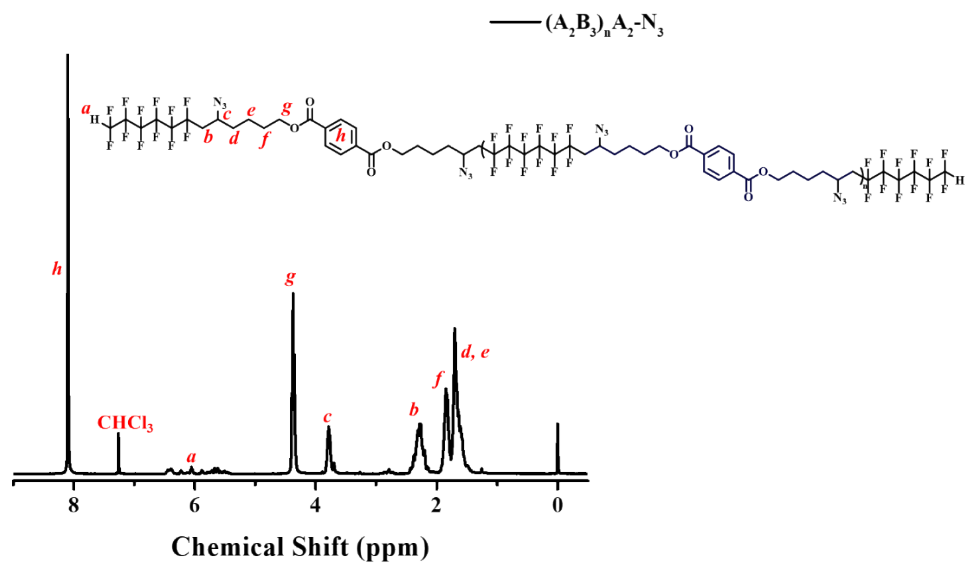

Fig. S5  $^1\text{H}$  NMR spectrum of semi-fluorinated alternating copolymer  $(A_2B_3)_n A_2-N_3$  in  $\text{CDCl}_3$ .

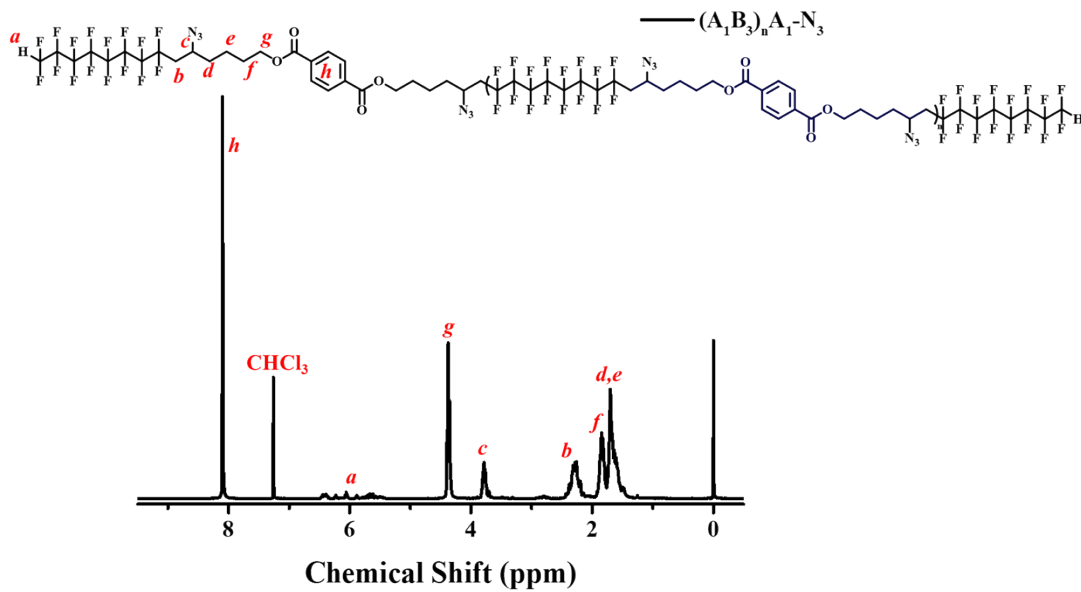

Fig. S6  $^1\text{H}$  NMR spectrum of semi-fluorinated alternating copolymer  $(A_1B_3)_n A_1-N_3$  in  $\text{CDCl}_3$ .

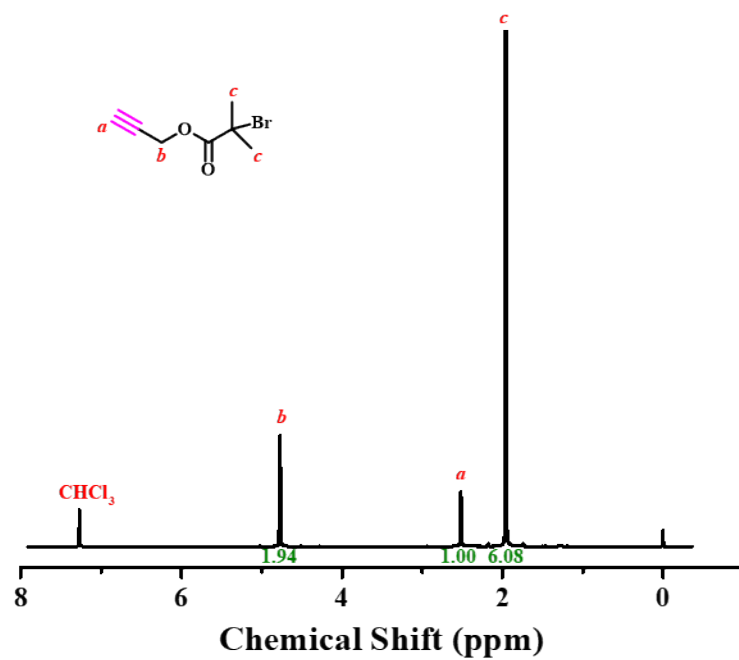

Fig. S7  $^1\text{H}$  NMR spectrum of PBiB in  $\text{CDCl}_3$ .

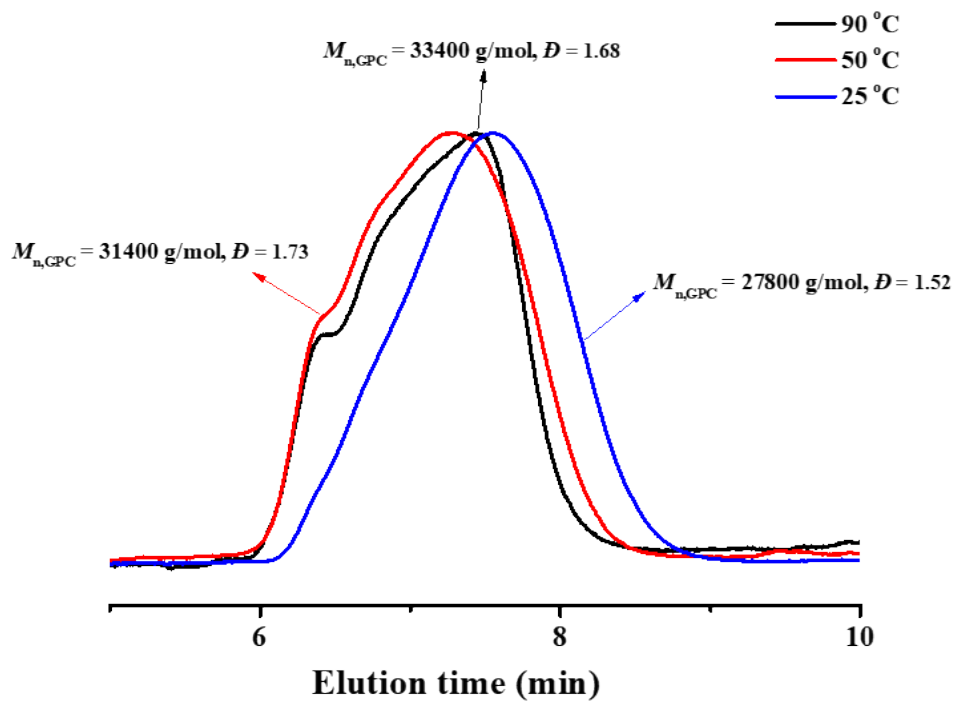

Fig. S8 GPC traces of graft copolymers  $(\text{A}_2\text{B}_1)_n\text{A}_2\text{-g-PMA}$  with different reaction temperatures.

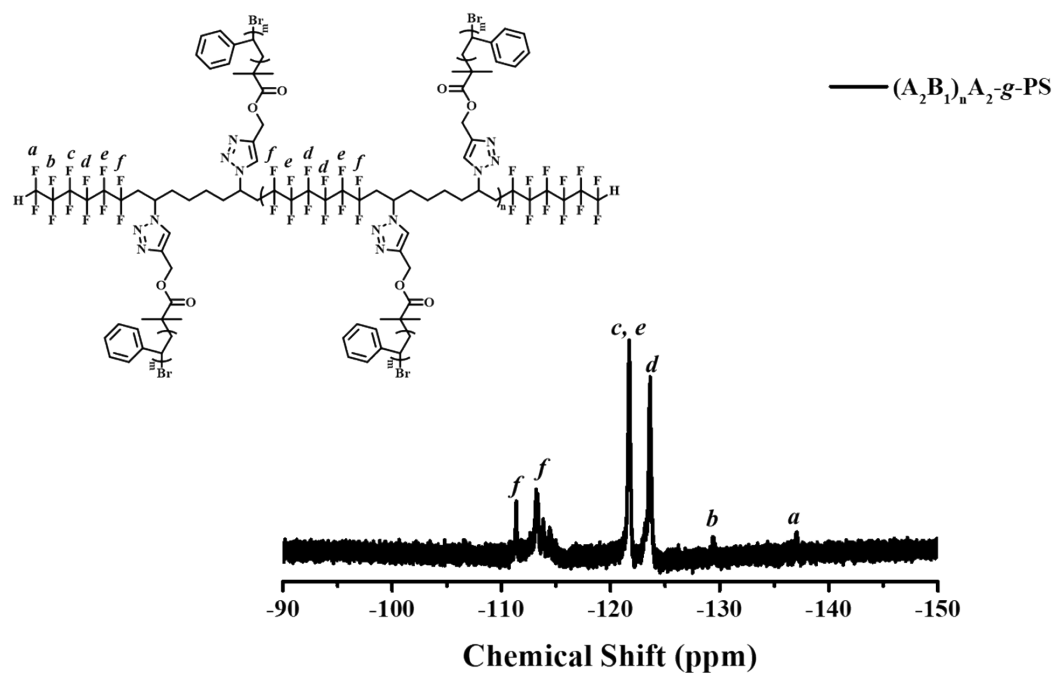

Fig. S9  $^{19}\text{F}$  NMR spectrum of the fluorinated graft copolymer  $(A_2B_1)_nA_2$ -g-PS in  $\text{CDCl}_3$ .

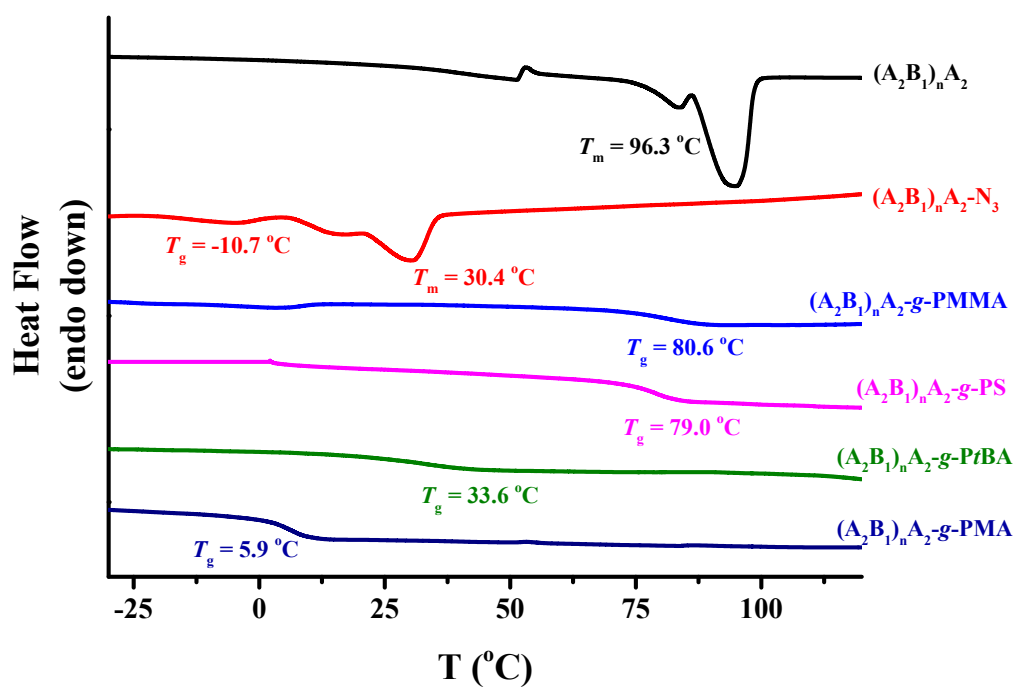

Fig. S10 DSC curves of semi-fluorinated alternating copolymers  $(A_2B_1)_nA_2$ ,  $(A_2B_1)_nA_2$ -N<sub>3</sub> and fluorinated graft copolymers with different monomers.

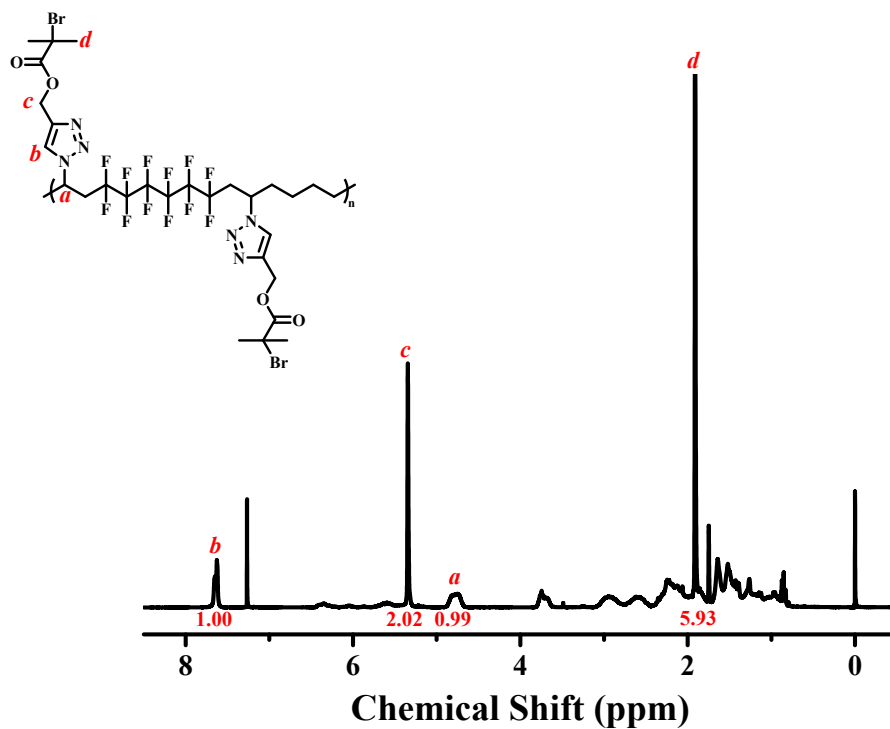

Fig. S11  $^1H$  NMR spectrum of the macroinitiator  $(A_2B_1)_nA_2-Br$  in  $CDCl_3$ .

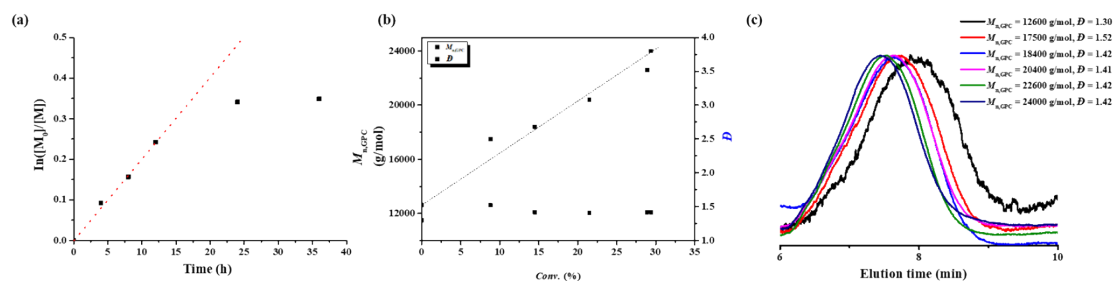

Fig. S12 (a)  $\ln([M]_0/[M])$  as a function of time, (b) number-average molar mass ( $M_{n,GPC}$ ) and molar mass dispersity ( $D$ ) versus monomer conversion, (c) GPC traces for “one-pot” CuAAC reaction and ATRP of MA. Polymerization conditions:  $[MA]_0/[PBiB]_0/[(A_2B_1)_nA_2-N_3]_0/[CuBr]_0/[PMDETA]_0 = 100/1/1/0.2/1$ ,  $V_{MA} = 2.5$  mL,  $V_{toluene} = 10.0$  mL,  $T = 25$  °C,  $M_{(A_2B_1)_nA_2-N_3} = 12500$  g/mol,  $D = 1.73$ .

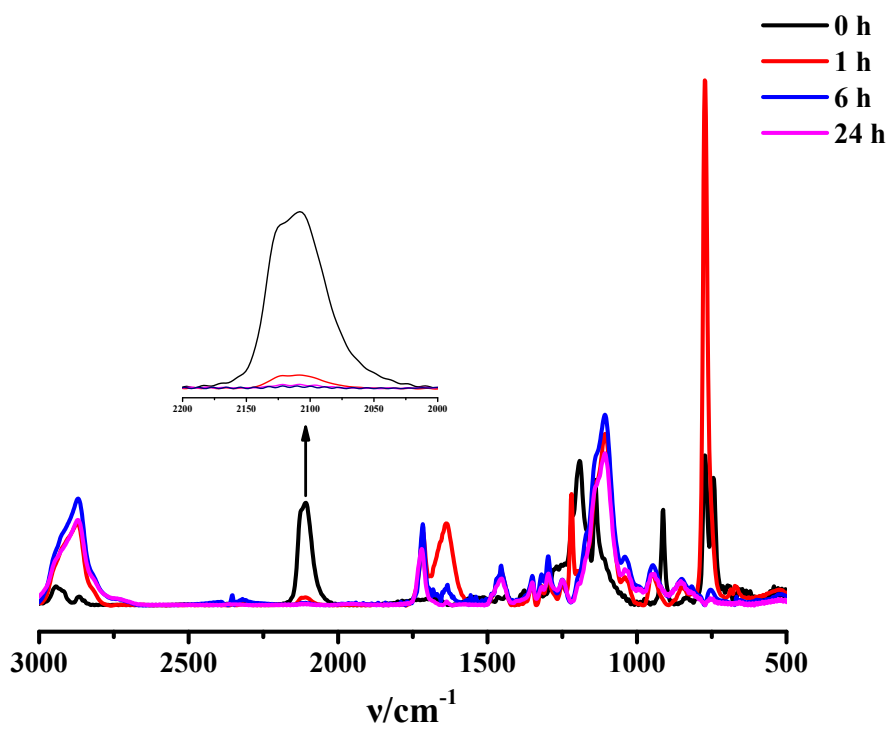

**Fig. S13** The FT-IR spectra of  $(A_2B_1)_nA_2$ -g-PPEGMA via “one-pot” process of CuAAC reaction and ATRP with different polymerization times.

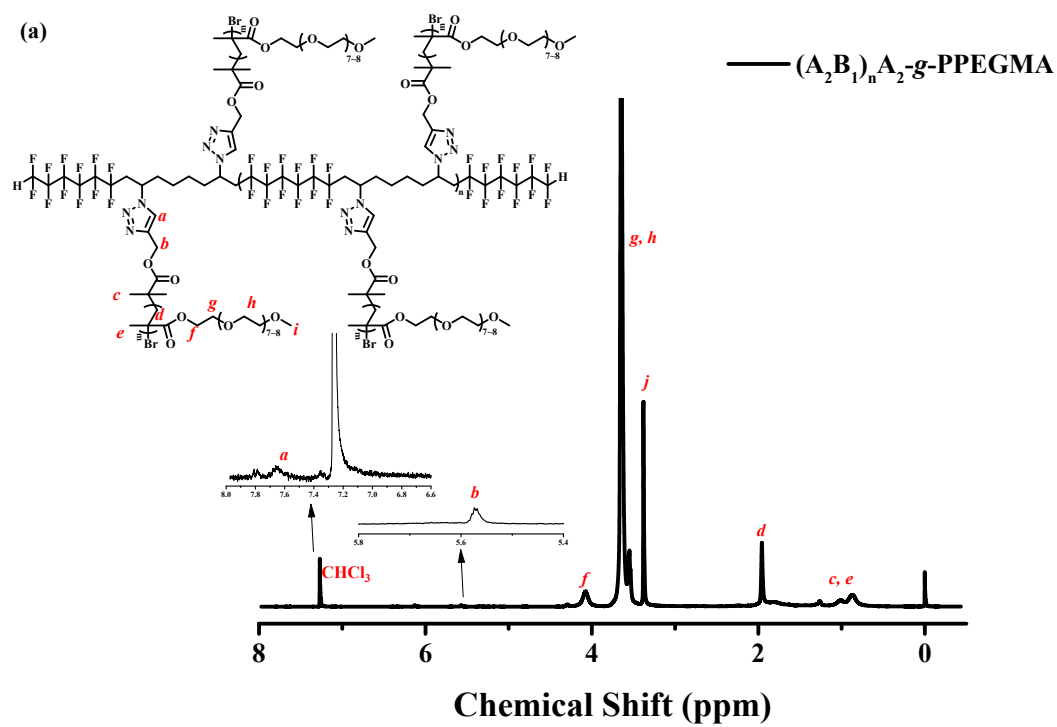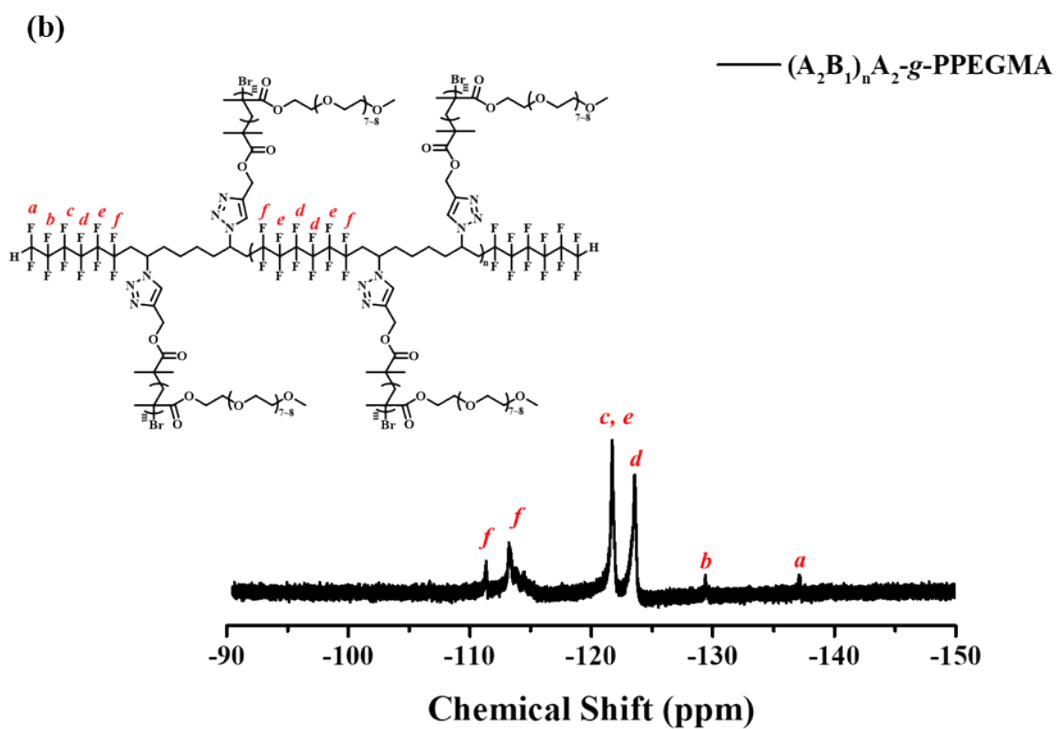

Fig. S14 (a)  $^1\text{H}$  NMR spectra and (b)  $^{19}\text{F}$  NMR spectrum of the fluorinated graft copolymer  $(A_2B_1)_n A_2$ -g-PPEGMA in  $\text{CDCl}_3$ .



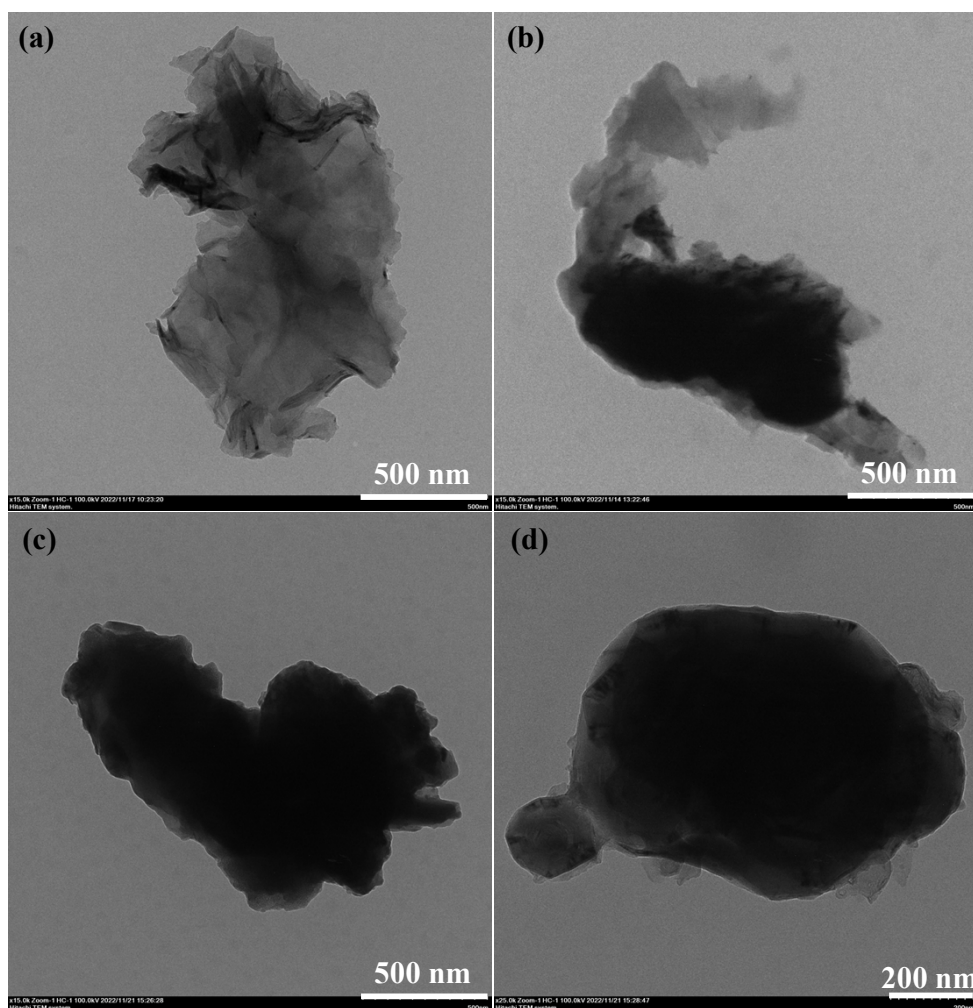

**Fig. S15** TEM images of fluorinated graft copolymer  $(A_1B_3)_nA_1$ -g-PPEGMA ( $M_{n,GPC} = 55500$  g/mol,  $D = 1.51$ ) and  $(A_2B_3)_nA_2$ -g-PPEGMA ( $M_{n,GPC} = 78300$  g/mol,  $D = 1.49$ ) aqueous solution (0.5 mg/mL).

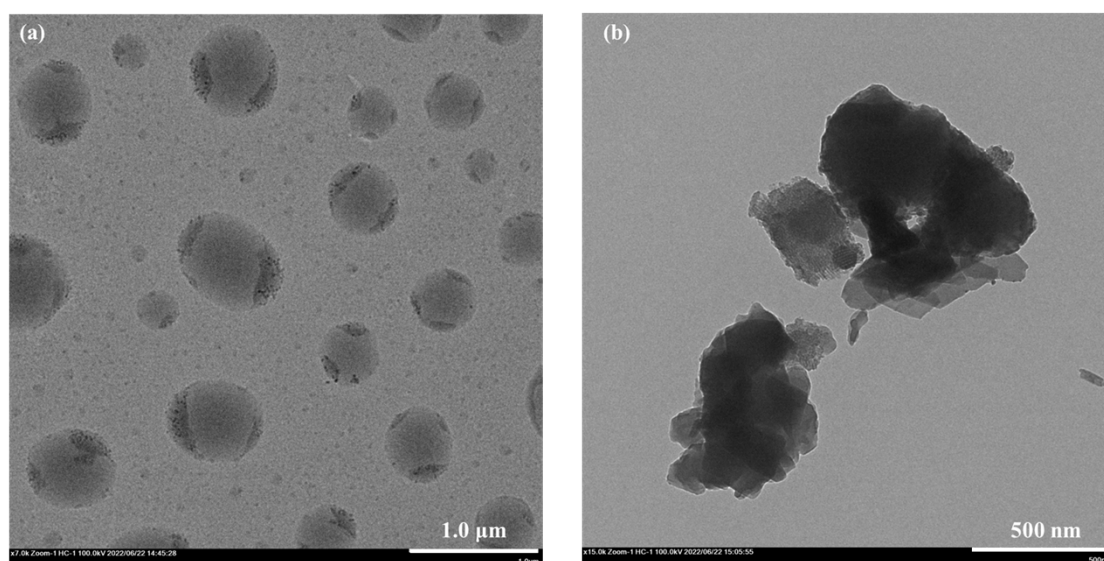

**Fig. S16** TEM images of  $(A_2B_1)_nA_2$ -g-PPEGMA ( $M_{n,GPC} = 80000$  g/mol,  $D = 1.46$ ) with a concentration of 0.5 mg/mL (a) THF/H<sub>2</sub>O and (b) DMF/H<sub>2</sub>O mixed solution.

## References

1. E. Murtezi and Y. Yagci, *Macromol. Rapid Commun.*, 2014, **35**, 1782-1787.
2. J. Cheng, K. Tu, E. He, J. Wang, L. Zhang, Z. Cheng and X. Zhu, *Polym. Chem.*, 2020, **11**, 7497-7505.
